# Supplementary material for: An exploratory study for tuft cells in the breast and their relevance in triple-negative breast cancer: the possible relationship of SOX9
Source: PubMed Central journal article supplement (PMC10183142; doi:10.1186/s12885-023-10949-5), 2023-05-13

1 **Supplementary information for**

2 **An exploratory study for tuft cells in the breast and their relevance in triple-negative**  
3 **breast cancer: the possible relationship of SOX9**

4

5 Yosuke Yamada, Ronald Simon, Kosuke Iwane, Yuki Nakanishi, Yasuhide Takeuchi, Akihiko

6 Yoshizawa, Masahiro Takada, Masakazu Toi, Hironori Haga, Alexander Marx, Guido Sauter

7

8 **Supplementary figure legends**

9 ***Figure S1. Pathological features of POU2F3-positive invasive breast carcinomas found in***  
10 ***our daily practice.***

11 (a–d) Tumor no. 5 (Table 1). This tumor displays the triple-negative subtype (a). The neoplastic  
12 cells are positive for POU2F3 (b), BCL2 (c), and KIT (d), and strongly express SOX9 (e) (a:  
13 H&E staining; b-e: immunohistochemistry).

14

Figure S1

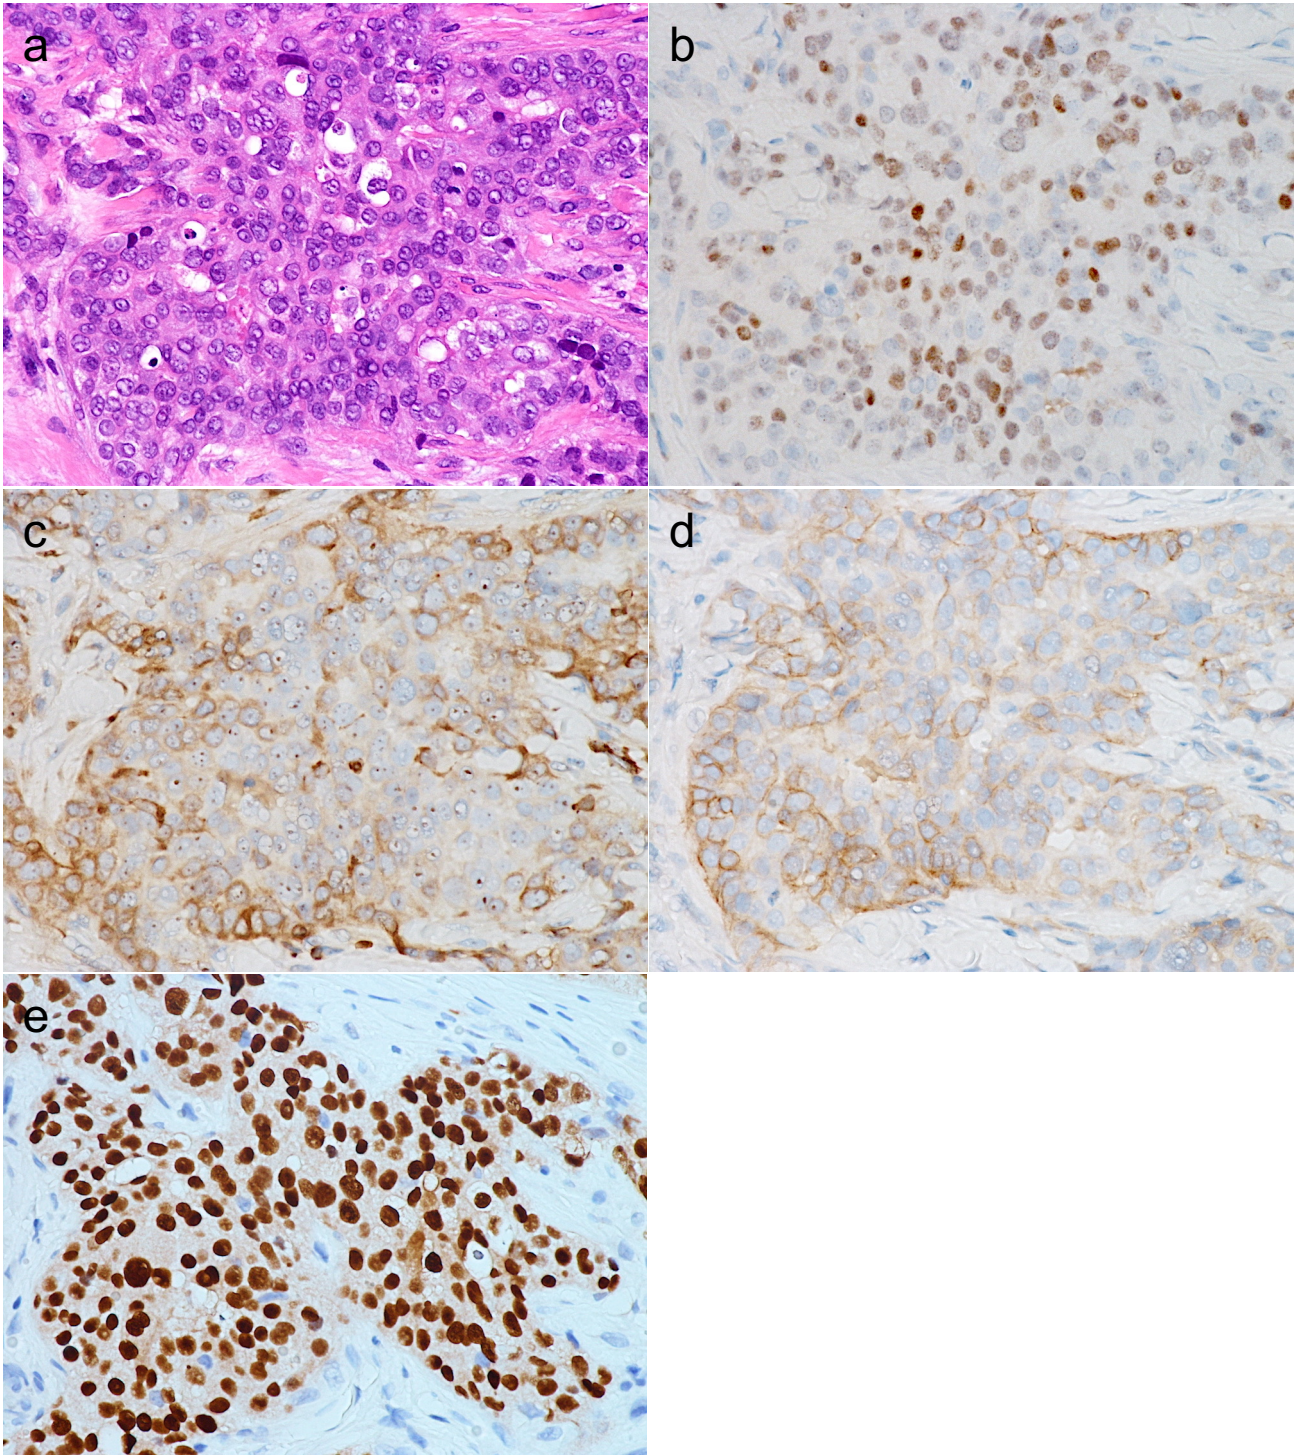

Supplement: 12885_2023_10949_MOESM1_ESM.pdf [file 12885_2023_10949_MOESM1_ESM.pdf]
